# Supplementary material for: Altered Expression of Three EGFR Posttranslational Regulators MDGI, MIG6, and EIG121 in Invasive Breast Carcinomas
Source: Anal Cell Pathol (Amst). 2020 Apr 20;2020:9268236. doi: 10.1155/2020/9268236 (PMC7189325; doi:10.1155/2020/9268236)
Supplement: Supplementary 2 — Table 2S: relationship between MDGI transcript levels and classical clinical biological parameters in a series of 440 breast cancer. [file 9268236.f2.zip]

Archive with 2 entries (2 files):
- ._Supplementary Table 2S Meseure et al.doc
- Supplementary Table 2S Meseure et al.doc
